# Supplementary material for: Structural racism, racial inequities and urban–rural differences in infant mortality in the US
Source: PubMed Central journal article supplement — J Epidemiol Community Health. 2021 Jan 27;75(8):788–93. doi: 10.1136/jech-2020-214260 (PMC8273079; doi:10.1136/jech-2020-214260), 2021-01-27
Supplement: NIHMS1691750-supplement-Supp1.pdf [file NIHMS1691750-supplement-Supp1.pdf]

## Appendix A

The tables below present results from sensitivity analyses in which we additionally controlled for the region of residence.

**Table 1:** Overall and race-specific IMR ratios (RR) and 95% confidence intervals (CI) for associations with structural racism indicators among the total county population, and by urban-rural areas in the US, 2013-2017

|                                  | Overall IMR       |              | Black IMR |              | White IMR         |              |
|----------------------------------|-------------------|--------------|-----------|--------------|-------------------|--------------|
|                                  | aRR               | 95% CI       | aRR       | 95% CI       | aRR               | 95% CI       |
| <b>All counties (N=1221)</b>     |                   |              |           |              |                   |              |
| <i>Educational attainment</i>    | 0.99              | (0.95; 1.03) | 1.01      | (0.96; 1.06) | 0.94 <sup>b</sup> | (0.89; 0.98) |
| <i>Median household income</i>   | 1.01              | (0.97; 1.04) | 1.01      | (0.97; 1.06) | 0.95 <sup>a</sup> | (0.91; 0.99) |
| <i>Jail incarceration rate</i>   | 0.96 <sup>b</sup> | (0.93; 0.99) | 1.04      | (0.99; 1.09) | 0.95 <sup>a</sup> | (0.91; 0.99) |
| <i>Overall structural racism</i> | 0.99              | (0.95; 1.03) | 1.03      | (0.98; 1.08) | 0.93 <sup>b</sup> | (0.89; 0.98) |
| <b>Urban counties (N=775)</b>    |                   |              |           |              |                   |              |
| <i>Educational attainment</i>    | 1.01              | (0.97; 1.0)  | 1.02      | (0.97; 1.08) | 0.93 <sup>b</sup> | (0.89; 0.97) |
| <i>Median household income</i>   | 1.02              | (0.98; 1.06) | 1.05      | (0.99; 1.10) | 0.95 <sup>a</sup> | (0.90; 0.99) |
| <i>Jail incarceration rate</i>   | 0.94 <sup>b</sup> | (0.90; 0.98) | 1.03      | (0.97; 1.09) | 0.94 <sup>b</sup> | (0.90; 0.99) |
| <i>Overall structural racism</i> | 1.00              | (0.96; 1.05) | 1.05      | (0.99; 1.11) | 0.93 <sup>a</sup> | (0.88; 0.99) |
| <b>Rural counties (N=436)</b>    |                   |              |           |              |                   |              |
| <i>Educational attainment</i>    | 0.98              | (0.90; 1.05) | 1.01      | (0.90; 1.15) | 1.00              | (0.90; 1.11) |
| <i>Median household income</i>   | 0.98              | (0.90; 1.07) | 0.95      | (0.85; 1.07) | 0.97              | (0.87; 1.08) |
| <i>Jail incarceration rate</i>   | 0.96              | (0.89; 1.03) | 1.06      | (0.95; 1.19) | 0.89 <sup>a</sup> | (0.81; 0.97) |
| <i>Overall structural racism</i> | 0.96              | (0.86; 1.03) | 0.95      | (0.84; 1.08) | 0.91              | (0.80; 1.04) |

**Note:** IMR=infant mortality rate; aRR=rate ratios adjusting for county-level poverty, population with a bachelor's degree or higher, county incarceration rate, and the region of residence; CI=confidence intervals.

<sup>a</sup> $P < .05$ ; <sup>b</sup> $P < 0.01$ .

**Table 2.** Linear regression coefficients (B) and 95% confidence interval (CI) for the associations between structural racism indicators and the absolute and relative racial inequity in IMR across all study counties, and by urban-rural areas in the US, 2013-2017.

|                                         | <b>Absolute racial inequities in IMR<br/>(Black-White IMR difference)</b> |               | <b>Relative racial inequities in IMR<br/>(Black/White IMR ratio)</b> |               |
|-----------------------------------------|---------------------------------------------------------------------------|---------------|----------------------------------------------------------------------|---------------|
|                                         | <b>B</b>                                                                  | <b>95% CI</b> | <b>B</b>                                                             | <b>95% CI</b> |
| <b>All counties (N=1221)</b>            |                                                                           |               |                                                                      |               |
| <i>Educational attainment</i>           | 1.58 <sup>b</sup>                                                         | (0.57; 2.70)  | 0.43 <sup>b</sup>                                                    | (0.14; 0.73)  |
| <i>Median household income</i>          | 0.82                                                                      | (-0.13; 1.77) | 0.29 <sup>a</sup>                                                    | (0.03; 0.54)  |
| <i>Jail incarceration rate</i>          | 1.25 <sup>a</sup>                                                         | (0.29; 2.20)  | 0.34 <sup>b</sup>                                                    | (0.09; 0.59)  |
| <b><i>Overall structural racism</i></b> | 1.58 <sup>b</sup>                                                         | (0.53; 2.64)  | 0.44 <sup>b</sup>                                                    | (0.15; 0.74)  |
| <b>Urban counties (N=775)</b>           |                                                                           |               |                                                                      |               |
| <i>Educational attainment</i>           | 1.25 <sup>a</sup>                                                         | (0.23; 2.27)  | 0.41 <sup>b</sup>                                                    | (0.11; 0.71)  |
| <i>Median household income</i>          | 0.92                                                                      | (-0.01; 1.85) | 0.33 <sup>a</sup>                                                    | (0.04; 0.62)  |
| <i>Jail incarceration rate</i>          | 1.17 <sup>a</sup>                                                         | (0.11; 2.22)  | 0.38 <sup>a</sup>                                                    | (0.07; 0.70)  |
| <b><i>Overall structural racism</i></b> | 1.39 <sup>b</sup>                                                         | (0.34; 2.45)  | 0.44 <sup>b</sup>                                                    | (0.11; 0.77)  |
| <b>Rural counties (N=436)</b>           |                                                                           |               |                                                                      |               |
| <i>Educational attainment</i>           | 1.71                                                                      | (-1.46; 4.87) | 0.09                                                                 | (-0.34; 0.53) |
| <i>Median household income</i>          | 0.08                                                                      | (-2.67; 2.83) | 0.19                                                                 | (-0.32; 0.70) |
| <i>Jail incarceration rate</i>          | 2.46                                                                      | (-0.25; 5.17) | 0.38                                                                 | (0.17; 0.93)  |
| <b><i>Overall structural racism</i></b> | 2.89                                                                      | (-0.16; 5.96) | 0.54                                                                 | (-0.07; 1.15) |

**Note:** IMR=infant mortality rate; aRR=rate ratios adjusting for county-level poverty, population with a bachelor's degree or higher, county incarceration rate, and the region of residence;

CI=confidence intervals.

<sup>a</sup> $P < .05$ ; <sup>b</sup> $P < 0.01$ .
